# Supplementary material for: Cohort study of risk factors for 30-day readmission after abdominal aortic aneurysm repair
Source: Atypon-hosted journal article supplement (doi:10.1024/0301-1526/a000767), 2018-12-12
Supplement: 0301-1526_a000767_esm1.pdf [file 0301-1526_a000767_esm1.pdf]

ESM 1. ICD-9 codes and descriptions.

| <i>Description</i>                                                                   | <i>ICD-9 codes</i> |
|--------------------------------------------------------------------------------------|--------------------|
| Non-ruptured abdominal aortic aneurysm (AAA)                                         | 441.4              |
| <i>Arterial embolism and thrombosis</i>                                              |                    |
| Atheroembolism, Kidney                                                               | 445.81             |
| Atheroembolism, Lower Extremity                                                      | 445.02             |
| Atheroembolism, Other Site                                                           | 445.89             |
| Arterial Embolism and Thrombosis of Lower Extremity                                  | 444.22             |
| Embolism and Thrombosis of Arteries of the Extremities                               | 444.2              |
| Arterial Embolism and Thrombosis                                                     | 444                |
| Arterial Embolism and Thrombosis of Upper Extremity                                  | 444.21             |
| Embolism and Thrombosis of Abdominal Aorta                                           | 444                |
| Embolism and Thrombosis of Iliac Artery                                              | 444.81             |
| Embolism and Thrombosis of Other Artery                                              | 444.89             |
| Embolism and Thrombosis of Thoracic Aorta                                            | 444.1              |
| Embolism and Thrombosis of Unspecified Artery                                        | 444.9              |
| Other Arterial Embolism and Thrombosis of Abdominal Aorta                            | 444.09             |
| Saddle Embolus of Abdominal Aorta                                                    | 444.01             |
| <i>Cardiac/Myocardial Infarction</i>                                                 |                    |
| Cardiac Arrest                                                                       | 427.5              |
| Ventricular Fibrillation                                                             | 427.41             |
| Cardiac Arrest                                                                       | 427.5              |
| Ventricular Fibrillation                                                             | 427.41             |
| Ventricular Flutter                                                                  | 427.42             |
| Acute Myocardial Infarction                                                          | 410                |
| Acute Myocardial Infarction, Subendocardial Infarction, Episode of Care Unspecified  | 410.7              |
| Acute Myocardial Infarction, Subendocardial Infarction, Initial Episode of Care      | 410.71             |
| Acute Myocardial Infarction, Subendocardial Infarction, Subsequent Episode of Care   | 410.72             |
| Acute Myocardial Infarction, True Posterior Wall Infarction, Initial Episode of Care | 410.61             |
| Acute Myocardial Infarction, Unspecified Site, Episode of Care Unspecified           | 410.9              |
| Acute Myocardial Infarction, Unspecified Site, Initial Episode of Care               | 410.91             |
| Acute Myocardial Infarction, Unspecified Site, Subsequent Episode of Care            | 410.92             |
| Acute Myocardial Infarction, of Anterolateral Wall, Initial Episode of Care          | 410.01             |
| Acute Myocardial Infarction, of Anterolateral Wall, Subsequent Episode of Care       | 410.02             |
| Acute Myocardial Infarction, of Inferolateral Wall, Initial Episode of Care          | 410.21             |
| Acute Myocardial Infarction, of Inferoposterior Wall, Episode of Care Unspecified    | 410.3              |
| Acute Myocardial Infarction, of Inferoposterior Wall, Initial Episode of Care        | 410.31             |
| Acute Myocardial Infarction, of Other Anterior Wall, Episode of Care Unspecified     | 410.1              |
| Acute Myocardial Infarction, of Other Anterior Wall, Initial Episode of Care         | 410.11             |
| Acute Myocardial Infarction, of Other Anterior Wall, Subsequent Episode of Care      | 410.12             |
| Acute Myocardial Infarction, of Other Inferior Wall, Episode of Care Unspecified     | 410.4              |
| Acute Myocardial Infarction, of Other Inferior Wall, Initial Episode of Care         | 410.41             |
| Acute Myocardial Infarction, of Other Lateral Wall, Initial Episode of Care          | 410.51             |
| Acute Myocardial Infarction, of Other Specified Sites, Episode of Care Unspecified   | 410.8              |
| Acute Myocardial Infarction, of Other Specified Sites, Initial Episode of Care       | 410.81             |
| <i>Fluid/electrolyte disorders</i>                                                   |                    |
| Hyposmolality and/or Hyponatremia                                                    | 276.1              |
| Hyperpotassemia                                                                      | 276.7              |
| Hypopotassemia                                                                       | 276.8              |
| Acidosis                                                                             | 276.2              |
| Alkalosis                                                                            | 276.3              |

|                                                                                       |        |
|---------------------------------------------------------------------------------------|--------|
| Angioneurotic Edema, Not Elsewhere Classified                                         | 995.1  |
| Electrolyte and Fluid Disorders Not Elsewhere Classified                              | 276.9  |
| Fluid Overload                                                                        | 276.6  |
| Hyperosmolality and/or Hypernatremia                                                  | 276    |
| Mixed Acid-Base Balance Disorder                                                      | 276.4  |
| Other Fluid Overload                                                                  | 276.69 |
| <i>Renal failure</i>                                                                  |        |
| Acute Kidney Failure with Lesion of Tubular Necrosis                                  | 584.5  |
| Acute Kidney Failure with Other Specified Pathological Lesion in Kidney               | 584.8  |
| Acute Kidney Failure, Unspecified                                                     | 584.9  |
| Renal Failure, Unspecified                                                            | 586    |
| <i>Respiratory Problems</i>                                                           |        |
| Acute Respiratory Failure                                                             | 518.81 |
| Acute and Chronic Respiratory Failure                                                 | 518.84 |
| Acute Respiratory Failure Following Trauma and Surgery                                | 518.51 |
| Acute and Chronic Respiratory Failure Following Trauma and Surgery                    | 518.53 |
| Chronic Respiratory Failure                                                           | 518.83 |
| Dependence on Respirator [ventilator], Status                                         | V46.11 |
| Encounter for Weaning from Respirator [ventilator]                                    | V46.13 |
| Other Pulmonary Insufficiency, Not Elsewhere Classified                               | 518.82 |
| Other Pulmonary Insufficiency, Not Elsewhere Classified, Following Trauma and Surgery | 518.52 |
| Pulmonary Insufficiency Following Trauma and Surgery                                  | 518.5  |
| Respiratory Arrest                                                                    | 799.1  |
| Abnormal Chest Sounds                                                                 | 786.7  |
| Acute Edema of Lung, Unspecified                                                      | 518.4  |
| Apnea                                                                                 | 786.03 |
| Cheyne-Stokes Respiration                                                             | 786.04 |
| Cough                                                                                 | 786.2  |
| Cyanosis                                                                              | 782.5  |
| Disorders of Diaphragm                                                                | 519.4  |
| Hemoptysis                                                                            | 786.3  |
| Hemoptysis, Unspecified                                                               | 786.3  |
| Hiccough                                                                              | 786.8  |
| Idiopathic Pulmonary Fibrosis                                                         | 516.31 |
| Lung Involvement in Other Diseases Classified Elsewhere                               | 517.8  |
| Lung Involvement in Systemic Sclerosis                                                | 517.2  |
| Lung Replaced by Transplant                                                           | V42.6  |
| Nonspecific (Abnormal) Findings on Radiological and Other Examination of Lung Field   | 793.1  |
| Orthopnea                                                                             | 786.02 |
| Other Diseases of Lung, Not Elsewhere Classified                                      | 518.89 |
| Other Diseases of Respiratory System, Not Elsewhere Classified                        | 519.8  |
| Other Dyspnea and Respiratory Abnormality                                             | 786.09 |
| Other Hemoptysis                                                                      | 786.39 |
| Other Nonspecific Abnormal Finding of Lung Field                                      | 793.19 |
| Other Specified Alveolar and Parietoalveolar Pneumonopathies                          | 516.8  |
| Other Symptoms Involving Respiratory System and Chest                                 | 786.9  |
| Personal History of Other Diseases of Respiratory System                              | V12.69 |
| Personal History of Pneumonia (Recurrent)                                             | V12.61 |
| Pulmonary Alveolar Proteinosis                                                        | 516    |
| Pulmonary Congestion and Hypostasis                                                   | 514    |
| Pulmonary Eosinophilia                                                                | 518.3  |
| Respiratory Abnormality, Unspecified                                                  | 786    |
| Shortness of Breath                                                                   | 786.05 |

|                                                                                       |        |
|---------------------------------------------------------------------------------------|--------|
| Solitary Pulmonary Nodule                                                             | 793.11 |
| Swelling, Mass, or Lump in Chest                                                      | 786.6  |
| Tachypnea                                                                             | 786.06 |
| Wheezing                                                                              | 786.07 |
| <i>Other venous embolism/thrombosis</i>                                               |        |
| Acute Venous Embolism and Thrombosis of Axillary Veins                                | 453.84 |
| Acute Venous Embolism and Thrombosis of Deep Veins of Upper Extremity                 | 453.82 |
| Acute Venous Embolism and Thrombosis of Deep Vessels of Distal Lower Extremity        | 453.42 |
| Acute Venous Embolism and Thrombosis of Deep Vessels of Proximal Lower Extremity      | 453.41 |
| Acute Venous Embolism and Thrombosis of Internal Jugular Veins                        | 453.86 |
| Acute Venous Embolism and Thrombosis of Other Specified Veins                         | 453.8  |
| Acute Venous Embolism and Thrombosis of Other Specified Veins                         | 453.89 |
| Acute Venous Embolism and Thrombosis of Other Thoracic Veins                          | 453.87 |
| Acute Venous Embolism and Thrombosis of Subclavian Veins                              | 453.85 |
| Acute Venous Embolism and Thrombosis of Superficial Veins of Upper Extremity          | 453.81 |
| Acute Venous Embolism and Thrombosis of Unspecified Deep Vessels of Lower Extremity   | 453.4  |
| Acute Venous Embolism and Thrombosis of Upper Extremity, Unspecified                  | 453.83 |
| Chronic Venous Embolism and Thrombosis of Deep Veins of Upper Extremity               | 453.72 |
| Chronic Venous Embolism and Thrombosis of Deep Vessels of Distal Lower Extremity      | 453.52 |
| Chronic Venous Embolism and Thrombosis of Deep Vessels of Proximal Lower Extremity    | 453.51 |
| Chronic Venous Embolism and Thrombosis of Internal Jugular Veins                      | 453.76 |
| Chronic Venous Embolism and Thrombosis of Other Thoracic Veins                        | 453.77 |
| Chronic Venous Embolism and Thrombosis of Superficial Veins of Upper Extremity        | 453.71 |
| Chronic Venous Embolism and Thrombosis of Unspecified Deep Vessels of Lower Extremity | 453.5  |
| Embolism and Thrombosis of Inferior Vena Cava                                         | 453.2  |
| Embolism and Thrombosis of Unspecified Site                                           | 453.9  |
| Personal History of Pulmonary Embolism                                                | V12.55 |
| Personal History of Venous Thrombosis and Embolism                                    | V12.51 |
| Portal Vein Thrombosis                                                                | 452    |
| Venous Embolism and Thrombosis of Superficial Vessels of Lower Extremity              | 453.6  |
| <i>Atrial fibrillation</i>                                                            |        |
| Atrial Fibrillation                                                                   | 427.31 |
| Atrial Fibrillation and Flutter                                                       | 427.3  |
| <i>Anemia</i>                                                                         |        |
| Iron Deficiency Anemia, Unspecified                                                   | 280.9  |
| Other Specified Iron Deficiency Anemias                                               | 280.8  |
| Folate-Deficiency Anemia                                                              | 281.2  |
| Other Vitamin B12 Deficiency Anemia                                                   | 281.1  |
| Pernicious Anemia                                                                     | 281    |
| Unspecified Deficiency Anemia                                                         | 281.9  |
| Iron Deficiency Anemia Secondary to Blood Loss (Chronic)                              | 280    |
| Anemia in Chronic Kidney Disease                                                      | 285.21 |
| Anemia in Neoplastic Disease                                                          | 285.22 |
| Anemia of Other Chronic Disease                                                       | 285.29 |
| Anemias Due to Disorders of Glutathione Metabolism                                    | 282.2  |
| Hereditary Spherocytosis                                                              | 282    |
| Other Specified Anemias                                                               | 285.8  |
| Other Thalassemia                                                                     | 282.49 |
| Thalassemia Minor                                                                     | 282.46 |
| Anemia, Unspecified                                                                   | 285.9  |
| Other and Unspecified Anemias                                                         | 285    |

### *Chronic Kidney Disease*

|                                                            |        |
|------------------------------------------------------------|--------|
| Chronic Kidney Disease (CKD)                               | 585    |
| Chronic Kidney Disease, Stage I                            | 585.1  |
| Chronic Kidney Disease, Stage II (Mild)                    | 585.2  |
| Chronic Kidney Disease, Stage III (Moderate)               | 585.3  |
| Chronic Kidney Disease, Stage IV (Severe)                  | 585.4  |
| Chronic Kidney Disease, Stage V                            | 585.5  |
| Chronic Kidney Disease, Unspecified                        | 585.9  |
| Encounter for Adequacy Testing for Hemodialysis            | V56.31 |
| Encounter for Extracorporeal Dialysis                      | V56.0  |
| End Stage Renal Disease                                    | 585.6  |
| Fitting and Adjustment of Extracorporeal Dialysis Catheter | V56.1  |
| Fitting and Adjustment of Peritoneal Dialysis Catheter     | V56.2  |
| Kidney Replaced by Transplant                              | V42.0  |
| Noncompliance with Renal Dialysis                          | V45.12 |
| Postsurgical Renal Dialysis Status                         | V45.1  |
| Renal Dialysis Status                                      | V45.11 |

### *Chronic Obstructive Pulmonary Disease (OCPD)*

|                                                          |        |
|----------------------------------------------------------|--------|
| Other Emphysema                                          | 492.8  |
| Chronic Airway Obstruction, Not Elsewhere Classified     | 496    |
| Obstructive Chronic Bronchitis with (Acute) Exacerbation | 491.21 |
| Obstructive Chronic Bronchitis with Acute Bronchitis     | 491.22 |
| Obstructive Chronic Bronchitis, without Exacerbation     | 491.2  |

### *Other conduction disorders*

|                                                                       |        |
|-----------------------------------------------------------------------|--------|
| Automatic Implantable Cardiac Defibrillator in Situ                   | V45.02 |
| Cardiac Pacemaker in Situ                                             | V45.0  |
| Cardiac Pacemaker in Situ                                             | V45.01 |
| Conduction Disorder, Unspecified                                      | 426.9  |
| Fitting and Adjustment of Automatic Implantable Cardiac Defibrillator | V53.32 |
| Fitting and Adjustment of Cardiac Pacemaker                           | V53.31 |
| Long Qt Syndrome                                                      | 426.82 |
| Other Heart Block                                                     | 426.6  |
| Other Specified Cardiac Device in Situ                                | V45.09 |
| Other Specified Conduction Disorders                                  | 426.89 |

### *Congestive Heart Failure*

|                                                                |        |
|----------------------------------------------------------------|--------|
| Acute Combined Systolic and Diastolic Heart Failure            | 428.41 |
| Acute Diastolic Heart Failure                                  | 428.31 |
| Acute Systolic Heart Failure                                   | 428.21 |
| Acute on Chronic Combined Systolic and Diastolic Heart Failure | 428.43 |
| Acute on Chronic Diastolic Heart Failure                       | 428.33 |
| Acute on Chronic Systolic Heart Failure                        | 428.23 |
| Chronic Combined Systolic and Diastolic Heart Failure          | 428.42 |
| Chronic Diastolic Heart Failure                                | 428.32 |
| Chronic Systolic Heart Failure                                 | 428.22 |
| Unspecified Combined Systolic and Diastolic Heart Failure      | 428.4  |
| Unspecified Diastolic Heart Failure                            | 428.3  |
| Unspecified Systolic Heart Failure                             | 428.2  |
| Congestive Heart Failure, Unspecified                          | 428    |
| Heart Failure, Unspecified                                     | 428.9  |
| Left Heart Failure                                             | 428.1  |
| Rheumatic Heart Failure (Congestive)                           | 398.91 |

### *Chronic Heart Disease*

|                                                                         |        |
|-------------------------------------------------------------------------|--------|
| Chronic Total Occlusion of Coronary Artery                              | 414.2  |
| Coronary Atherosclerosis                                                | 414    |
| Coronary Atherosclerosis of Native Coronary Artery                      | 414.01 |
| Coronary Atherosclerosis of Unspecified Type of Vessel, Native or Graft | 414    |
| Percutaneous Transluminal Coronary Angioplasty, Postsurgical Status     | V45.82 |
| Chronic Ischemic Heart Disease, Unspecified                             | 414.9  |
| Old Myocardial Infarction                                               | 412    |
| Other Specified Forms of Chronic Ischemic Heart Disease                 | 414.8  |
| Postsurgical Aortocoronary Bypass Status                                | V45.81 |

### *Depressive disorders*

|                                                                                                    |        |
|----------------------------------------------------------------------------------------------------|--------|
| Depressive Disorder, Not Elsewhere Classified                                                      | 311    |
| Dysthymic Disorder                                                                                 | 300.4  |
| Major Depressive Disorder, Recurrent Episode, Moderate Degree                                      | 296.32 |
| Major Depressive Disorder, Recurrent Episode, Severe Degree, Specified as with Psychotic Behavior  | 296.34 |
| Major Depressive Disorder, Recurrent Episode, Severe Degree, without Mention of Psychotic Behavior | 296.33 |
| Major Depressive Disorder, Recurrent Episode, Unspecified Degree                                   | 296.3  |
| Major Depressive Disorder, Single Episode, Moderate Degree                                         | 296.22 |
| Major Depressive Disorder, Single Episode, Severe Degree, without Mention of Psychotic Behavior    | 296.23 |
| Major Depressive Disorder, Single Episode, Unspecified Degree                                      | 296.2  |
| Major Depressive Disorder, Single Episode, in Partial or Unspecified Remission                     | 296.25 |
| Mood Disorder in Conditions Classified Elsewhere                                                   | 293.83 |

### *Diabetes*

|                                                                                                                  |        |
|------------------------------------------------------------------------------------------------------------------|--------|
| Diabetes Mellitus                                                                                                | 250    |
| Diabetes Mellitus without Mention of Complication, Type I [juvenile Type], Not Stated as Uncontrolled            | 250.01 |
| Diabetes mellitus without mention of complication, type II or unspecified type, not stated as uncontrolled       | 250    |
| Impaired Fasting Glucose                                                                                         | 790.21 |
| Impaired Glucose Tolerance Test (Oral)                                                                           | 790.22 |
| Insulin Pump Status                                                                                              | V45.85 |
| Other Abnormal Glucose                                                                                           | 790.29 |
| Secondary Diabetes Mellitus without Mention of Complication, Not Stated as Uncontrolled, or Unspecified          | 249    |
| Diabetes Mellitus with Ketoacidosis, Type I [juvenile Type], Uncontrolled                                        | 250.13 |
| Diabetes Mellitus with Ketoacidosis, Type II or Unspecified Type, Not Stated as Uncontrolled                     | 250.1  |
| Diabetes Mellitus without Mention of Complication, Type I [juvenile Type], Uncontrolled                          | 250.03 |
| Diabetes mellitus with ketoacidosis, type II or unspecified type, uncontrolled                                   | 250.12 |
| Diabetes mellitus without mention of complication, type II or unspecified type, uncontrolled                     | 250.02 |
| Secondary Diabetes Mellitus without Mention of Complication, Uncontrolled                                        | 249.01 |
| Diabetes Mellitus with Renal Manifestations, Type I [juvenile Type], Not Stated as Uncontrolled                  | 250.41 |
| Diabetes Mellitus with Renal Manifestations, Type I [juvenile Type], Uncontrolled                                | 250.43 |
| Diabetes mellitus with renal manifestations, type II or unspecified type, not stated as uncontrolled             | 250.4  |
| Diabetes mellitus with renal manifestations, type II or unspecified type, uncontrolled                           | 250.42 |
| Secondary Diabetes Mellitus with Renal Manifestations, Uncontrolled                                              | 249.41 |
| Diabetes Mellitus with Ophthalmic Manifestations, Type I [juvenile Type], Not Stated as Uncontrolled             | 250.51 |
| Diabetes Mellitus with Ophthalmic Manifestations, Type I [juvenile Type], Uncontrolled                           | 250.53 |
| Diabetes mellitus with ophthalmic manifestations, type II or unspecified type, not stated as uncontrolled        | 250.5  |
| Diabetes mellitus with ophthalmic manifestations, type II or unspecified type, uncontrolled                      | 250.52 |
| Diabetes Mellitus with Neurological Manifestations, Type I [juvenile Type], Not Stated as Uncontrolled           | 250.61 |
| Diabetes Mellitus with Neurological Manifestations, Type I [juvenile Type], Uncontrolled                         | 250.63 |
| Diabetes mellitus with neurological manifestations, type II or unspecified type, not stated as uncontrolled      | 250.6  |
| Diabetes mellitus with neurological manifestations, type II or unspecified type, uncontrolled                    | 250.62 |
| Secondary Diabetes Mellitus with Neurological Manifestations, Not Stated as Uncontrolled, or Unspecified         | 249.6  |
| Diabetes Mellitus with Peripheral Circulatory Disorders, Type II or Unspecified Type, Not Stated as Uncontrolled | 250.7  |
| Diabetes Mellitus with Peripheral Circulatory Disorders, Type I [juvenile Type], Not Stated as Uncontrolled      | 250.71 |

|                                                                                                                                                      |        |
|------------------------------------------------------------------------------------------------------------------------------------------------------|--------|
| Diabetes Mellitus with Peripheral Circulatory Disorders, Type I [juvenile Type], Uncontrolled                                                        | 250.73 |
| Diabetes mellitus with peripheral circulatory disorders, type II or unspecified type, uncontrolled                                                   | 250.72 |
| Diabetes with Peripheral Circulatory Disorders                                                                                                       | 250.7  |
| Secondary Diabetes Mellitus with Peripheral Circulatory Disorders, Not Stated as Uncontrolled, or Unspecified                                        | 249.7  |
| Secondary Diabetes Mellitus with Peripheral Circulatory Disorders, Uncontrolled                                                                      | 249.71 |
| Diabetes mellitus with unspecified complication, type II or unspecified type, not stated as uncontrolled                                             | 250.9  |
| Diabetes Mellitus with Other Coma, Type I [juvenile Type], Uncontrolled                                                                              | 250.33 |
| Diabetes Mellitus with Other Specified Manifestations, Type I [juvenile Type], Not Stated as Uncontrolled                                            | 250.81 |
| Diabetes Mellitus with Other Specified Manifestations, Type I [juvenile Type], Uncontrolled                                                          | 250.83 |
| Diabetes Mellitus with Unspecified Complication, Type I [juvenile Type], Uncontrolled                                                                | 250.93 |
| Diabetes mellitus with hyperosmolarity, type II or unspecified type, not stated as uncontrolled                                                      | 250.2  |
| Diabetes mellitus with hyperosmolarity, type II or unspecified type, uncontrolled                                                                    | 250.22 |
| Diabetes mellitus with other coma, type II or unspecified type, uncontrolled                                                                         | 250.32 |
| Diabetes mellitus with other specified manifestations, type II or unspecified type, not stated as uncontrolled                                       | 250.8  |
| Diabetes mellitus with other specified manifestations, type II or unspecified type, uncontrolled                                                     | 250.82 |
| Diabetes mellitus with unspecified complication, type II or unspecified type, uncontrolled                                                           | 250.92 |
| Secondary Diabetes Mellitus with Other Specified Manifestations, Not Stated as Uncontrolled, or Unspecified                                          | 249.8  |
| <br><i>Disorders of lipid metabolism</i>                                                                                                             |        |
| Mixed Hyperlipidemia                                                                                                                                 | 272.2  |
| Other and Unspecified Hyperlipidemia                                                                                                                 | 272.4  |
| Pure Hypercholesterolemia                                                                                                                            | 272    |
| Pure Hyperglyceridemia                                                                                                                               | 272.1  |
| <br><i>End Stage Renal Disease (ESRD)</i>                                                                                                            |        |
| Chronic Kidney Disease, Stage V                                                                                                                      | 585.5  |
| End Stage Renal Disease                                                                                                                              | 585.6  |
| Hypertensive Chronic Kidney Disease, Benign, with Chronic Kidney Disease Stage V or End Stage Renal Disease                                          | 403.11 |
| Hypertensive Chronic Kidney Disease, Malignant, with Chronic Kidney Disease Stage V or End Stage Renal Disease                                       | 403.01 |
| Hypertensive Chronic Kidney Disease, Unspecified, with Chronic Kidney Disease Stage V or End Stage Renal Disease                                     | 403.91 |
| Hypertensive Heart and Chronic Kidney Disease, Malignant, without Heart Failure and with Chronic Kidney Disease Stage V or End Stage Renal Disease   | 404.02 |
| Hypertensive Heart and Chronic Kidney Disease, Unspecified, with Heart Failure and Chronic Kidney Disease Stage V or End Stage Renal Disease         | 404.93 |
| Hypertensive Heart and Chronic Kidney Disease, Unspecified, without Heart Failure and with Chronic Kidney Disease Stage V or End Stage Renal Disease | 404.92 |
| <br><i>Hypertension</i>                                                                                                                              |        |
| Benign Essential Hypertension                                                                                                                        | 401.1  |
| Essential Hypertension                                                                                                                               | 401    |
| Unspecified Essential Hypertension                                                                                                                   | 401.9  |
| Hypertensive Chronic Kidney Disease, Benign, with Chronic Kidney Disease Stage I Through Stage IV, or Unspecified                                    | 403.1  |
| Hypertensive Chronic Kidney Disease, Benign, with Chronic Kidney Disease Stage V or End Stage Renal Disease                                          | 403.11 |
| Hypertensive Chronic Kidney Disease, Malignant, with Chronic Kidney Disease Stage I Through Stage IV, or Unspecified                                 | 403    |
| Hypertensive Chronic Kidney Disease, Malignant, with Chronic Kidney Disease Stage V or End Stage Renal Disease                                       | 403.01 |
| Hypertensive Chronic Kidney Disease, Unspecified, with Chronic Kidney Disease Stage I Through Stage IV, or Unspecified                               | 403.9  |
| Hypertensive Chronic Kidney Disease, Unspecified, with Chronic Kidney Disease Stage V or End Stage Renal Disease                                     | 403.91 |
| Hypertensive Heart Disease, Benign, with Heart Failure                                                                                               | 402.11 |
| Hypertensive Heart Disease, Benign, without Heart Failure                                                                                            | 402.1  |
| Hypertensive Heart Disease, Malignant, with Heart Failure                                                                                            | 402.01 |
| Hypertensive Heart Disease, Malignant, without Heart Failure                                                                                         | 402    |
| Hypertensive Heart Disease, Unspecified, with Heart Failure                                                                                          | 402.91 |
| Hypertensive Heart Disease, Unspecified, without Heart Failure                                                                                       | 402.9  |

|                                                                                                                                                            |        |
|------------------------------------------------------------------------------------------------------------------------------------------------------------|--------|
| Hypertensive Heart and Chronic Kidney Disease, Benign, with Heart Failure and with Chronic Kidney Disease Stage I Through Stage IV, or Unspecified         | 404.11 |
| Hypertensive Heart and Chronic Kidney Disease, Benign, without Heart Failure and with Chronic Kidney Disease Stage I Through Stage IV, or Unspecified      | 404.1  |
| Hypertensive Heart and Chronic Kidney Disease, Malignant, with Heart Failure and with Chronic Kidney Disease Stage I Through Stage IV, or Unspecified      | 404.01 |
| Hypertensive Heart and Chronic Kidney Disease, Malignant, without Heart Failure and with Chronic Kidney Disease Stage I Through Stage IV, or Unspecified   | 404    |
| Hypertensive Heart and Chronic Kidney Disease, Malignant, without Heart Failure and with Chronic Kidney Disease Stage V or End Stage Renal Disease         | 404.02 |
| Hypertensive Heart and Chronic Kidney Disease, Unspecified, with Heart Failure and Chronic Kidney Disease Stage V or End Stage Renal Disease               | 404.93 |
| Hypertensive Heart and Chronic Kidney Disease, Unspecified, with Heart Failure and with Chronic Kidney Disease Stage I Through Stage IV, or Unspecified    | 404.91 |
| Hypertensive Heart and Chronic Kidney Disease, Unspecified, without Heart Failure and with Chronic Kidney Disease Stage I Through Stage IV, or Unspecified | 404.9  |
| Hypertensive Heart and Chronic Kidney Disease, Unspecified, without Heart Failure and with Chronic Kidney Disease Stage V or End Stage Renal Disease       | 404.92 |
| Benign Renovascular Hypertension                                                                                                                           | 405.11 |
| Hypertensive Encephalopathy                                                                                                                                | 437.2  |
| Malignant Essential Hypertension                                                                                                                           | 401    |
| Malignant Renovascular Hypertension                                                                                                                        | 405.01 |
| Other Malignant Secondary Hypertension                                                                                                                     | 405.09 |
| Unspecified Renovascular Hypertension                                                                                                                      | 405.91 |

#### *Osteoarthritis*

|                                                                                                                                  |        |
|----------------------------------------------------------------------------------------------------------------------------------|--------|
| Osteoarthritis, Localized, Not Specified Whether Primary or Secondary, Involving Hand                                            | 715.34 |
| Osteoarthritis, Localized, Not Specified Whether Primary or Secondary, Involving Lower Leg                                       | 715.36 |
| Osteoarthritis, Localized, Not Specified Whether Primary or Secondary, Involving Other Specified Sites                           | 715.38 |
| Osteoarthritis, Localized, Not Specified Whether Primary or Secondary, Involving Pelvic Region and Thigh                         | 715.35 |
| Osteoarthritis, Localized, Not Specified Whether Primary or Secondary, Involving Shoulder Region                                 | 715.31 |
| Osteoarthritis, Localized, Not Specified Whether Primary or Secondary, Involving Unspecified Site                                | 715.3  |
| Osteoarthritis, Localized, Primary, Involving Hand                                                                               | 715.14 |
| Osteoarthritis, Localized, Primary, Involving Lower Leg                                                                          | 715.16 |
| Osteoarthritis, Localized, Primary, Involving Pelvic Region and Thigh                                                            | 715.15 |
| Osteoarthritis, Localized, Primary, Involving Shoulder Region                                                                    | 715.11 |
| Osteoarthritis, Localized, Primary, Involving Unspecified Site                                                                   | 715.1  |
| Osteoarthritis Involving or with Mention of More Than One Site, but Not Specified as Generalized, and Involving Unspecified Site | 715.8  |
| Osteoarthritis Involving or with Mention of Multiple Sites, but Not Specified as Generalized                                     | 715.89 |
| Osteoarthritis, Generalized, Involving Multiple Sites                                                                            | 715.09 |
| Osteoarthritis, Generalized, Involving Unspecified Site                                                                          | 715    |
| Osteoarthritis, Unspecified Whether Generalized or Localized                                                                     | 715.9  |
| Osteoarthritis, Unspecified Whether Generalized or Localized, Involving Ankle and Foot                                           | 715.97 |
| Osteoarthritis, Unspecified Whether Generalized or Localized, Involving Hand                                                     | 715.94 |
| Osteoarthritis, Unspecified Whether Generalized or Localized, Involving Lower Leg                                                | 715.96 |
| Osteoarthritis, Unspecified Whether Generalized or Localized, Involving Other Specified Sites                                    | 715.98 |
| Osteoarthritis, Unspecified Whether Generalized or Localized, Involving Pelvic Region and Thigh                                  | 715.95 |
| Osteoarthritis, Unspecified Whether Generalized or Localized, Involving Shoulder Region                                          | 715.91 |
| Osteoarthritis, Unspecified Whether Generalized or Localized, Involving Unspecified Site                                         | 715.9  |
| Personal History of Arthritis                                                                                                    | V13.4  |

#### *Other thyroid disorders*

|                                 |       |
|---------------------------------|-------|
| Chronic Lymphocytic Thyroiditis | 245.2 |
| Cyst of Thyroid                 | 246.2 |

|                                                                                |        |
|--------------------------------------------------------------------------------|--------|
| Goiter, Unspecified                                                            | 240.9  |
| Nonspecific Abnormal Results of Function Study of Thyroid                      | 794.5  |
| Nontoxic Multinodular Goiter                                                   | 241.1  |
| Nontoxic Uninodular Goiter                                                     | 241    |
| Other Iatrogenic Hypothyroidism                                                | 244.3  |
| Other Postablative Hypothyroidism                                              | 244.1  |
| Other Specified Acquired Hypothyroidism                                        | 244.8  |
| Other Specified Disorders of Thyroid                                           | 246.8  |
| Postsurgical Hypothyroidism                                                    | 244    |
| Unspecified Disorder of Thyroid                                                | 246.9  |
| Unspecified Hypothyroidism                                                     | 244.9  |
| Unspecified Nontoxic Nodular Goiter                                            | 241.9  |
| <br><i>Tobacco-Related Disorders</i>                                           |        |
| Personal History of Tobacco Use                                                | V15.82 |
| Tobacco Use Disorder                                                           | 305.1  |
| <br><i>Complications of Procedure</i>                                          |        |
| Atherosclerosis of Autologous Vein Bypass Graft of the Extremities             | 440.31 |
| Atherosclerosis of Bypass Graft of the Extremities, Unspecified Graft          | 440.3  |
| Atherosclerosis of Nonautologous Biological Bypass Graft of the Extremities    | 440.32 |
| Coronary Atherosclerosis of Artery Bypass Graft                                | 414.04 |
| Coronary Atherosclerosis of Autologous Vein Bypass Graft                       | 414.02 |
| Coronary Atherosclerosis of Bypass Graft (Artery) (Vein) of Transplanted Heart | 414.07 |
| Coronary Atherosclerosis of Unspecified Type of Bypass Graft                   | 414.05 |
| Mechanical Complication of Other Vascular Device, Implant, and Graft           | 996.1  |
| Other Complications Due to Other Vascular Device, Implant, and Graft           | 996.74 |
| Other Late Amputation Stump Complication                                       | 997.69 |
| Other Vascular Complications of Medical Care, Not Elsewhere Classified         | 999.2  |
| Peripheral Vascular Complications, Not Elsewhere Classified                    | 997.2  |
| Unspecified Late Complication of Amputation Stump                              | 997.6  |
| <br><i>Hemorrhage/Hematoma</i>                                                 |        |
| Hematoma Complicating a Procedure                                              | 998.12 |
| Hemorrhage Complicating a Procedure                                            | 998.11 |
| Seroma Complicating a Procedure                                                | 998.13 |
| <br><i>Posthemorrhagic Anemia</i>                                              |        |
| Acute Posthemorrhagic Anemia                                                   | 285.1  |
| <br><i>Pneumonia</i>                                                           |        |
| Pulmonary mycobacteria                                                         | 031.0  |
| Viral pneumonia NEC                                                            | 480.8  |
| Pneumococcal pneumonia                                                         | 481    |
| Other bacterial pneumonia                                                      | 482    |
| Pneumonia due to Hemophilus influenzae                                         | 482.2  |
| Methicillin susceptible pneumonia due to Staphylococcus aureus                 | 482.41 |
| Methicillin resistant pneumonia due to Staphylococcus aureus                   | 482.42 |
| Pneumonia due to other gram-negative bacteria                                  | 482.83 |
| Bacterial pneumonia NOS                                                        | 482.9  |
| Pneumonia due to other specified organism                                      | 483.8  |
| Bronchopneumonia, organism unspecified                                         | 485    |
| Pneumonia, organism unspecified                                                | 486    |

*Sepsis*



|                                                                                                                              |                          |
|------------------------------------------------------------------------------------------------------------------------------|--------------------------|
| Streptococcal septicemia                                                                                                     | 038.0                    |
| Staphylococcal septicemia, unspecified                                                                                       | 038.10                   |
| Methicillin susceptible Staphylococcus aureus septicemia                                                                     | 038.11                   |
| Methicillin resistant Staphylococcus aureus septicemia                                                                       | 038.12                   |
| Other staphylococcal septicemia                                                                                              | 038.19                   |
| Septicemia due to gram-negative organism, unspecified                                                                        | 038.40                   |
| Septicemia due to escherichia coli [E. coli]                                                                                 | 038.42                   |
| Septicemia due to serratia                                                                                                   | 038.44                   |
| Other septicemia due to gram-negative organisms                                                                              | 038.49                   |
| Other specified septicemias                                                                                                  | 038.8                    |
| Unspecified septicemia                                                                                                       | 038.9                    |
| Septic arterial embolism                                                                                                     | 449                      |
| Bacteremia                                                                                                                   | 790.7                    |
| Sepsis                                                                                                                       | 995.91                   |
| Severe sepsis                                                                                                                | 995.92                   |
| <br><i>Surgical Site Infection</i>                                                                                           |                          |
| Other specified local infections of skin & subcutaneous tissue                                                               | 686.8                    |
| Unspecified local infection of skin & subcutaneous tissue                                                                    | 686.9                    |
| Infection & inflammatory reaction due to other vascular device, implant, & graft                                             | 996.62                   |
| Infection (chronic) of amputation stump                                                                                      | 997.62                   |
| Infected postoperative seroma                                                                                                | 998.51                   |
| Other postoperative infection                                                                                                | 998.59                   |
| <br><i>Lower Extremity Cellulitis</i>                                                                                        |                          |
| Cellulitis & abscess of toe, unspecified                                                                                     | 681.10                   |
| Cellulitis & abscess of leg, except foot                                                                                     | 682.6                    |
| Cellulitis & abscess of foot, except toes                                                                                    | 682.7                    |
| <br><i>Urinary Tract Infection</i>                                                                                           |                          |
| Urinary tract infection, site not specified                                                                                  | 599.0                    |
| Infection & inflammatory reaction due to indwelling urinary catheter                                                         | 996.64                   |
| <br><i>Other Infections</i>                                                                                                  |                          |
| Tularemia, Anthrax, Brucellosis, GI&ers                                                                                      | 021–024                  |
| Cutaneous diphtheria                                                                                                         | 032.85                   |
| Other specified diphtheria                                                                                                   | 032.89                   |
| Other bacterial diseases                                                                                                     | 040                      |
| Streptococcus infection in conditions classified elsewhere & of unspecified site, streptococcus, group B                     | 041.02                   |
| Streptococcus infection in conditions classified elsewhere & of unspecified site, streptococcus, group D [Enterococcus]      | 041.04                   |
| Streptococcus infection in conditions classified elsewhere & of unspecified site, other streptococcus                        | 041.09–041.12,<br>041.19 |
| Pneumococcus infection in conditions classified elsewhere & of unspecified site                                              | 041.2–041.4              |
| Other & unspecified Escherichia coli [E. coli]                                                                               | 041.49                   |
| Proteus (mirabilis) (morganii) infection in conditions classified elsewhere & of unspecified site                            | 041.6                    |
| Pseudomonas infection in conditions classified elsewhere & of unspecified site                                               | 041.7                    |
| Bacteroides fragilis                                                                                                         | 041.82                   |
| Other specified bacterial infections in conditions classified elsewhere & of unspecified site, other anaerobes               | 041.84                   |
| Other specified bacterial infections in conditions classified elsewhere & of unspecified site, other gram-negative organisms | 041.85                   |
| Helicobacter pylori [H. pylori]                                                                                              | 041.86                   |
| Other specified bacterial infections in conditions classified elsewhere & of unspecified site, other specified bacteria      | 041.89                   |
| Bacterial infection, unspecified, in conditions classified elsewhere & of unspecified site                                   | 041.9                    |
| Other cellulitis & abscess                                                                                                   | 682                      |

|                                                                                                        |        |
|--------------------------------------------------------------------------------------------------------|--------|
| Cellulitis & abscess of trunk                                                                          | 682.2  |
| Cellulitis & abscess of buttock                                                                        | 682.5  |
| Cellulitis & abscess of other specified sites                                                          | 682.8  |
| Cellulitis & abscess of unspecified sites                                                              | 682.9  |
| Pyoderma gangrenosum                                                                                   | 686.01 |
| Carbuncle & furuncle of trunk                                                                          | 680.2  |
| Infection & inflammatory reaction due to other genitourinary device, implant, & graft                  | 996.65 |
| Infection & inflammatory reaction due to internal joint prosthesis                                     | 996.66 |
| Infection & inflammatory reaction due to other internal orthopedic device, implant, & graft            | 996.67 |
| Infection & inflammatory reaction due to other internal prosthetic device, implant, & graft            | 996.69 |
| Infection due to central venous catheter                                                               | 999.31 |
| Infection with microorganisms without mention of resistance to multiple drugs                          | V09.80 |
| Infection with microorganisms with resistance to multiple drugs                                        | V09.81 |
| Infection with drug-resistant microorganisms, unspecified, without mention of multiple drug resistance | V09.90 |
| Infection with drug-resistant microorganisms, unspecified, with multiple drug resistance               | V09.91 |

---
