# Supplementary material for: Cohort study of risk factors for 30-day readmission after abdominal aortic aneurysm repair
Source: Atypon-hosted journal article supplement (doi:10.1024/0301-1526/a000767), 2018-12-12
Supplement: 0301-1526_a000767_esm2.pdf [file 0301-1526_a000767_esm2.pdf]

**ESM 2. Table.** Multivariable logistic regression of risk factors for 30-day readmission, overall and by AAA procedure type.

|                                   | Overall (N = 355) |         | EVAR (n = 203)   |         | Open (n = 152)   |         |
|-----------------------------------|-------------------|---------|------------------|---------|------------------|---------|
|                                   | OR (95 % CI)      | p-value | OR (95 % CI)     | p-value | OR (95 % CI)     | p-value |
| Propensity score                  | 2.97 (0.97–9.10)  | .06     |                  |         |                  |         |
| Procedure type–EVAR               | 0.71 (0.54–0.92)  | .009    |                  |         |                  |         |
| Age in years                      | 1.03 (1.01–1.05)  | .005    | 1.02 (1.01–1.04) | .01     | 1.00 (0.99–1.02) | .61     |
| Race (reference = Caucasian)      |                   |         |                  |         |                  |         |
| African American                  | 1.45 (0.98–2.13)  | .06     | 1.30 (0.74–2.29) | .36     | 1.47 (0.85–2.54) | .17     |
| Other or unknown                  | 0.73 (0.41–1.31)  | .28     | 0.98 (0.50–1.93) | .96     | 0.44 (0.13–1.45) | .17     |
| Male gender                       | 0.84 (0.66–1.07)  | .14     | 0.75 (0.54–1.05) | .09     | 0.91 (0.64–1.30) | .60     |
| Charlson Index                    | 1.12 (1.04–1.21)  | .002    | 1.20 (1.09–1.33) | .001    | 0.97 (0.85–1.11) | .69     |
| <i>Acute/chronic Problems</i>     |                   |         |                  |         |                  |         |
| Renal failure                     |                   |         | 1.64 (0.92–2.93) | .09     |                  |         |
| Lipid metabolism                  |                   |         | 0.77 (0.56–1.04) | .09     |                  |         |
| Chronic heart failure             |                   |         |                  |         | 2.18 (1.22–3.89) | .008    |
| Tobacco-related disorder          | 0.80 (0.64–1.00)  | .05     |                  |         |                  |         |
| <i>Other Complications</i>        |                   |         |                  |         |                  |         |
| Surgical site infection           | 2.79 (1.25–6.22)  | .01     | 5.62 (0.89–35.6) | .07     | 2.91 (1.17–7.28) | .02     |
| Complications with procedure      |                   |         |                  |         | 1.66 (0.99–2.79) | .05     |
| <i>Post-operative medications</i> |                   |         |                  |         |                  |         |
| Bronchodilators                   | 1.34 (1.06–1.70)  | .01     | 1.39 (1.03–1.88) | .03     |                  |         |
| Statins                           | 0.65 (0.52–0.82)  | <.001   | 0.71 (0.53–0.96) | .02     | 0.55 (0.38–0.79) | .001    |
| H2 blockers                       | 0.76 (0.60–0.96)  | .02     |                  |         |                  |         |
| Steroids                          | 1.45 (1.04–2.02)  | .03     |                  |         | 1.92 (1.24–2.96) | .003    |
| Vasodilators                      | 0.78 (0.61–1.00)  | .04     | 0.68 (0.48–0.95) | .02     |                  |         |
| <i>Post-operative lab results</i> |                   |         |                  |         |                  |         |
| Serum potassium (ref = normal)    |                   |         |                  |         |                  |         |
| High (> 5.2)                      | 1.89 (1.16–3.06)  | .01     | 2.19 (1.01–4.74) | .05     |                  |         |
| Low (< 3.7)                       | 0.97 (0.76–1.25)  | .83     | 1.01 (0.74–1.40) | .93     |                  |         |

OR: odds ratio; CI: confidence interval; EVAR: endovascular aneurysm repair.
